# Supplementary material for: CTLA-4 antibody-drug conjugate reveals autologous destruction of B-lymphocytes associated with regulatory T cell impairment
Source: eLife journal article supplement (doi:10.7554/elife.87281), 2023-05-03
Supplement: fig1-data1 [file Figure 1-Source Data 2.xlsx]

## Sheet: sheet
	Fig. 1B
	Ab ug/ mL	hIgGFc		hIgGFc-DM1		Ipi		Ipi-DM1
	4	0.0457	0.0492	0.0521	0.0617	2.1289	2.2417	2.2381	2.2483
	1	0.0478	0.0549	0.0508	0.0609	2.3536	2.4382	2.3218	2.3726
	0.25	0.0536	0.055	0.0475	0.0573	2.0963	2.1394	2.0598	2.2098
	0.0625	0.0475	0.0539	0.0497	0.0633	1.63	1.6481	1.5715	1.5958
	0.015625	0.0471	0.0502	0.0458	0.0537	0.7174	0.759	0.6299	0.6534
	0.003906	0.0448	0.0501	0.0494	0.0596	0.2326	0.2519	0.2076	0.2258
	0.000977	0.0502	0.049	0.0464	0.0525	0.0984	0.1057	0.09	0.1027
	0.000244	0.0482	0.0545	0.0493	0.0682	0.0593	0.0766	0.064	0.0795
