# Supplementary material for: CTLA-4 antibody-drug conjugate reveals autologous destruction of B-lymphocytes associated with regulatory T cell impairment
Source: eLife journal article supplement (doi:10.7554/elife.87281), 2023-05-03
Supplement: fig1-data1 [file Figure 1-Source Data 3.xlsx]

## Sheet: Sheet1
	Fig. 1C
	Ab ug/ mL	Ipi	Ipi-DM1
	0	174	174
	0.5	3983	3200
	2	6615	6124
	10	7240	7031
