# Supplementary material for: CTLA-4 antibody-drug conjugate reveals autologous destruction of B-lymphocytes associated with regulatory T cell impairment
Source: eLife journal article supplement (doi:10.7554/elife.87281), 2023-05-03
Supplement: fig1-data1 [file Figure 1-Source Data 4.xlsx]

## Sheet: Sheet1
	Fig. 1E % foxp3 in CD4			Fig. 1E normalized cell number
	hIgGFc	Ipi-DM1		hIgGFc	Ipi-DM1
	7.26	6.52		0.819909	0.505332
	8.11	5.84		1.12978	0.635849
	7.16	6.9		1.06912	0.636489
	8.97	6.93		0.978714	0.537443
	8.66	6.05		1.00217	0.580633
	7.81	7.96		0.98098	1.00067
	7.89	6.79		1.01961	0.695054
	8.54	7.1		1.17127	1.20697
	8.36	6.82		1.38348	0.537948
	8.48	7.14		1.02205	0.707672
	7.78	8.98		0.809216	1.0394
	8.73	7.22		0.772053	0.651862
	8.78	7.08		0.841932	0.561691
		8.27			0.627666
