# Supplementary material for: CTLA-4 antibody-drug conjugate reveals autologous destruction of B-lymphocytes associated with regulatory T cell impairment
Source: eLife journal article supplement (doi:10.7554/elife.87281), 2023-05-03
Supplement: fig1-data1 [file Figure 1-Source Data 5.xlsx]

## Sheet: Sheet1
	Fig. 1F
	hIgGFc	Ipi-DM1
	0.892045	1.00649
	1.10996	1.01747
	1.08645	0.790142
	1.05509	0.90929
	1.05979	0.729
	0.881071	0.887342
	0.915561	0.721161
	1.00215	0.651363
	1.10904	0.639885
	0.915352	0.72023
	0.740316	0.875179
	1.19512	0.968436
	1.04878	1.04017
		1.0703
