# Supplementary material for: CTLA-4 antibody-drug conjugate reveals autologous destruction of B-lymphocytes associated with regulatory T cell impairment
Source: eLife journal article supplement (doi:10.7554/elife.87281), 2023-05-03
Supplement: fig1-data1 [file Figure 1-Source Data 6.xlsx]

## Sheet: Sheet1
	Fig. 1G
	hIgGFc	Ipi-DM1
	15.7	18.5
	22.7	18.8
	20.6	10.3
	25.3	22.2
	19.7	13.4
	21	22.3
	20.6	14.2
	18.8	13.9
	24.8	22.3
	18.9	17
	23.3	10.6
	28.4	11.6
	24.4	17.7
		12.6
