# Supplementary material for: CTLA-4 antibody-drug conjugate reveals autologous destruction of B-lymphocytes associated with regulatory T cell impairment
Source: eLife journal article supplement (doi:10.7554/elife.87281), 2023-05-03
Supplement: fig1-data1 [file Figure 1-Source Data 7.xlsx]

## Sheet: Sheet1
	Fig. 1H % B220 in CD45			Fig. 1H normalized cell number
	hIgGFc	Ipi-DM1		hIgGFc	Ipi-DM1
	45.9	31.8		0.811977	0.398872
	55.8	28		1.43316	0.520418
	50.1	38.8		1.18415	0.535584
	55.2	44		1.13525	0.543691
	49.4	32		0.960106	0.475404
	39.6	39.2		0.616315	0.705522
	46.9	35.7		0.858886	0.544513
	45.7	41.6		1.00439	1.11914
	51	28.4		1.41585	0.403588
	47.3	35.8		0.96602	0.510957
	52.1	36		1.07892	0.561391
	50.2	33.1		0.83314	0.461937
	44.6	33.7		0.701674	0.441224
		36.4			0.481751
