# Supplementary material for: CTLA-4 antibody-drug conjugate reveals autologous destruction of B-lymphocytes associated with regulatory T cell impairment
Source: eLife journal article supplement (doi:10.7554/elife.87281), 2023-05-03
Supplement: fig1-data1 [file Figure 1-Source Data 8.xlsx]

## Sheet: Sheet1
	Fig. 1I
	hIgGFc	Ipi-DM1
	9.07	21.9
	21.2	17.4
	15.3	24
	11.2	16.3
	11.2	19.5
	8.86	19.2
	12.2	23.7
	8.7	11.7
	6.99	17.3
	10.3	10.9
	9.93	8.62
	11.1	9.16
	7.96	10.4
		15.5
