# Supplementary material for: CTLA-4 antibody-drug conjugate reveals autologous destruction of B-lymphocytes associated with regulatory T cell impairment
Source: eLife journal article supplement (doi:10.7554/elife.87281), 2023-05-03
Supplement: fig1-data1 [file Figure 1-Source Data 9.xlsx]

## Sheet: Sheet1
	Fig. 1J %Foxp3 in CD4+B220-			Fig. 1J cell number
	hIgGFc	Ipi-DM1		hIgGFc	Ipi-DM1
	36.3	25.3		51100	42300
	34.2	21.5		62300	26400
	34.8	24.5		68900	59400
	37	18.6		90300	56600
	35.8	21.9		119000	31000
