# Supplementary material for: CTLA-4 antibody-drug conjugate reveals autologous destruction of B-lymphocytes associated with regulatory T cell impairment
Source: eLife journal article supplement (doi:10.7554/elife.87281), 2023-05-03
Supplement: fig1-data1 [file Figure 1-Source Data 10.xlsx]

## Sheet: Sheet1
	Fig. 1K
	hIgGFc	Ipi-DM1
	1.05583	0.546739
	1.07437	0.812
	0.894822	0.656782
	0.88208	0.759875
	1.0929	0.7703
