# Supplementary material for: CTLA-4 antibody-drug conjugate reveals autologous destruction of B-lymphocytes associated with regulatory T cell impairment
Source: eLife journal article supplement (doi:10.7554/elife.87281), 2023-05-03
Supplement: fig1-data1 [file Figure 1-Source Data 11.xlsx]

## Sheet: Sheet1
	Fig. 1L
	hIgGFc	Ipi-DM1
	18	21.5
	19	17.7
	20.5	15.9
	17.6	15.8
	17.9	13.8
