# Supplementary material for: CTLA-4 antibody-drug conjugate reveals autologous destruction of B-lymphocytes associated with regulatory T cell impairment
Source: eLife journal article supplement (doi:10.7554/elife.87281), 2023-05-03
Supplement: fig1-data1 [file Figure 1-Source Data 12.xlsx]

## Sheet: Sheet1
	Fig. 1N %Mature B cells			Fig. 1N cell number
	hIgGFc	Ipi-DM1		hIgGFc	Ipi-DM1
	36.8	10.7		772102	96449
	29.9	9.92		569974	128712
	36.8	14.9		395717	185001
	43.7	2.94		782808	21521
	42.5	19.7		433906	254165
