# Supplementary material for: CTLA-4 antibody-drug conjugate reveals autologous destruction of B-lymphocytes associated with regulatory T cell impairment
Source: eLife journal article supplement (doi:10.7554/elife.87281), 2023-05-03
Supplement: fig1-data1 [file Figure 1-Source Data 13.xlsx]

## Sheet: Sheet1
	Fig. 1O %Immature T1 B cells			Fig. 1O cell number
	hIgGFc	Ipi-DM1		hIgGFc	Ipi-DM1
	5.53	4.81		115994	43259
	7.43	5.64		141704	73139
	5.36	7.95		57598	98917
	5.2	3.56		93162	26044
	7.17	4.54		73117	58482
