# Supplementary material for: CTLA-4 antibody-drug conjugate reveals autologous destruction of B-lymphocytes associated with regulatory T cell impairment
Source: eLife journal article supplement (doi:10.7554/elife.87281), 2023-05-03
Supplement: fig1-data1 [file Figure 1-Source Data 14.xlsx]

## Sheet: Sheet1
	Fig. 1Q %Pre-pro/Pro/Pre B cells				Fig. 1Q cell number
	hIgGFc	Ipi-DM1			hIgGFc	Ipi-DM1
	35	54.7			733644	491716
	39.5	55.2			752925	716395
	35.8	47.3			384401	589122
	31.4	61.4			563277	449138
	32.4	49.8			330625	642444
