# Supplementary material for: CTLA-4 antibody-drug conjugate reveals autologous destruction of B-lymphocytes associated with regulatory T cell impairment
Source: eLife journal article supplement (doi:10.7554/elife.87281), 2023-05-03
Supplement: fig1-data1 [file Figure 1-Source Data 15.xlsx]

## Sheet: Sheet1
	Fig. 1R
	hIgGFc	Ipi-DM1
	537	380
	468	468
	458	440
	548	348
	578	434
