# Supplementary material for: CTLA-4 antibody-drug conjugate reveals autologous destruction of B-lymphocytes associated with regulatory T cell impairment
Source: eLife journal article supplement (doi:10.7554/elife.87281), 2023-05-03
Supplement: fig1-figsupp1-data1 [file elife-87281-fig1-figsupp1-data1-v1.zip]

## Sheet: Sheet1
	CHO-hCTLA-4						WT CHO
	Ab ug/mL	Ipi		Ipi-DM1			Ab ug/mL	Ipi		Ipi-DM1
	1.5625	85.8385	103.354	23.4783	24.3478		1.5625	99.4009	94.7926	101.843	96.4977
	0.390625	77.5713	99.0087	20.0743	21.5613		0.390625	87.3888	96.7845	101.163	81.4595
	0.097656	101.255	120.502	39.3305	41.5621		0.097656	97.1576	105.004	106.272	91.6608
	0.024414	79.085	106.013	85.098	73.4641		0.024414	95.0157	105.523	95.1055	82.8918
	0.006104	86.5578	98.2412	91.0804	83.2915		0.006104	94.4054	108.811	104.371	91.8233
