# Supplementary material for: CTLA-4 antibody-drug conjugate reveals autologous destruction of B-lymphocytes associated with regulatory T cell impairment
Source: eLife journal article supplement (doi:10.7554/elife.87281), 2023-05-03
Supplement: fig1-figsupp3-data1 [file elife-87281-fig1-figsupp3-data1-v1.zip]

## Sheet: Sheet1
	A) % CD4-nonTregs blood			A) normalized cell number
	hIgGFc	Ipi-DM1		hIgGFc	Ipi-DM1
	20.8	20.3		0.904036	0.62463
	17.5	19.4		1.10464	0.884581
	20.6	21.8		1.1964	0.741253
	17	20.5		0.857136	0.622637
	19.1	21.3		0.912206	0.778519
	26.1	22.5		0.999126	0.998107
	22.8	22		1.02652	0.823452
	18.602	19.1806		1.15256	1.45584
	17.8295	16.9585		1.39686	0.679308
	17.6406	21.143		1.01636	0.850063
	15.1579	22.0528		0.885641	0.969604
	15.877	19.6781		0.743545	0.773316
	18.1474	18.4921		0.805039	0.682505
		17.1882			0.64059
