# Supplementary material for: CTLA-4 antibody-drug conjugate reveals autologous destruction of B-lymphocytes associated with regulatory T cell impairment
Source: eLife journal article supplement (doi:10.7554/elife.87281), 2023-05-03
Supplement: fig1-figsupp3-data1 [file Figure 1-Figure Supplement 3-Source Data 2.xlsx]

## Sheet: Sheet1
	B)
	hIgGFc	Ipi-DM1
	0.712798	1.06967
	1.04127	1.34419
	1.22113	0.993942
	0.724158	1.04127
	1.7607	1.04127
	0.73741	1.05074
	0.802726	0.858576
	0.995671	0.961261
	1.04865	1.04865
	1.03991	1.1273
	0.866009	1.23216
	0.90009	1.06613
	1.19721	1.01369
		1.20595
