# Supplementary material for: CTLA-4 antibody-drug conjugate reveals autologous destruction of B-lymphocytes associated with regulatory T cell impairment
Source: eLife journal article supplement (doi:10.7554/elife.87281), 2023-05-03
Supplement: fig1-figsupp3-data1 [file Figure 1-Figure Supplement 3-Source Data 3.xlsx]

## Sheet: Sheet1
	C) % CD4-nonTregs BM			C) cell number
	hIgGFc	Ipi-DM1		hIgGFc	Ipi-DM1
	0.48033	0.7191		83500	118000
	0.49734	0.4494		112000	92100
	0.71838	0.91904		121000	174000
	0.65601	1.35344		144000	234000
	0.98697	0.57876		196000	105000
