# Supplementary material for: CTLA-4 antibody-drug conjugate reveals autologous destruction of B-lymphocytes associated with regulatory T cell impairment
Source: eLife journal article supplement (doi:10.7554/elife.87281), 2023-05-03
Supplement: fig1-figsupp3-data1 [file Figure 1-Figure Supplement 3-Source Data 4.xlsx]

## Sheet: Sheet1
	D)
	hIgGFc	Ipi-DM1
	1.00683	0.908703
	1.21587	0.895904
	0.772184	1.02816
	0.678328	1.04096
	1.32679	1.12628
