# Supplementary material for: CTLA-4 antibody-drug conjugate reveals autologous destruction of B-lymphocytes associated with regulatory T cell impairment
Source: eLife journal article supplement (doi:10.7554/elife.87281), 2023-05-03
Supplement: fig1-figsupp7-data1 [file elife-87281-fig1-figsupp7-data1-v1.zip]

## Sheet: Sheet1
	C) % Pre-pro/pro B cells			C) cell number
	hIgGFc	Ipi-DM1		hIgGFc	Ipi-DM1
	11.9	25.6		249510	230563
	14.2	22.5		270933	291797
	17.9	15.2		191917	189227
	12.6	21		225834	153455
	13.2	21.3		135149	275088
