# Supplementary material for: CTLA-4 antibody-drug conjugate reveals autologous destruction of B-lymphocytes associated with regulatory T cell impairment
Source: eLife journal article supplement (doi:10.7554/elife.87281), 2023-05-03
Supplement: fig1-figsupp7-data1 [file Figure 1-Figure Supplement 7-Source Data 1.xlsx]

## Sheet: Sheet1
	B) % Pre B cells			B) cell number
	hIgGFc	Ipi-DM1		hIgGFc	Ipi-DM1
	19.3	23.9		404272	214698
	20.8	27		397834	349793
	14.4	26.8		154688	333220
	14.8	32.6		265650	238916
	15.6	23.1		159557	297383
