# Supplementary material for: CTLA-4 antibody-drug conjugate reveals autologous destruction of B-lymphocytes associated with regulatory T cell impairment
Source: eLife journal article supplement (doi:10.7554/elife.87281), 2023-05-03
Supplement: fig2-figsupp1-data1 [file elife-87281-fig2-figsupp1-data1-v1.zip]

## Sheet: Sheet1
	C) LNs
		hIgGFc					Ipi-DM1
	Early- Apo	4.07	4.86	2.11	6.66	8.88	3.85	3.09	11.8	11.3	13
	Late- Apo	79.2	83.1	88.1	86.3	82.5	77.8	70.3	71.5	65.8	67.9
