# Supplementary material for: CTLA-4 antibody-drug conjugate reveals autologous destruction of B-lymphocytes associated with regulatory T cell impairment
Source: eLife journal article supplement (doi:10.7554/elife.87281), 2023-05-03
Supplement: fig2-figsupp1-data1 [file Figure 2-Figure Supplement 1-Source Data 1.xlsx]

## Sheet: Sheet1
	A) blood
		hIgGFc					Ipi-DM1
	Early- Apo	1.19	1.35	1.02	1.3	1.1	1.41	2.41	1.48	1.25	1.55
	Late- Apo	0.72	1.05	0.96	1.75	0.78	0.98	1.39	0.52	0.37	2.08
