# Supplementary material for: CTLA-4 antibody-drug conjugate reveals autologous destruction of B-lymphocytes associated with regulatory T cell impairment
Source: eLife journal article supplement (doi:10.7554/elife.87281), 2023-05-03
Supplement: fig2-figsupp1-data1 [file Figure 2-Figure Supplement 1-Source Data 2.xlsx]

## Sheet: Sheet1
	B) spleen
		hIgGFc					Ipi-DM1
	Early- Apo	9.68	10	9.13	6.84	8.68	10.9	10.7	9.26	7.98	9.77
	Late- Apo	40.6	42.3	47	48.9	56.2	47.5	47.9	43.6	57.8	52
