# Supplementary material for: CTLA-4 antibody-drug conjugate reveals autologous destruction of B-lymphocytes associated with regulatory T cell impairment
Source: eLife journal article supplement (doi:10.7554/elife.87281), 2023-05-03
Supplement: fig3-data1 [file elife-87281-fig3-data1-v1.zip]

## Sheet: Sheet1
	Fig. 3F
	days	hIgGFc										Ipi-DM1
	3	1.07359	0.928277	1.23845	0.795017	0.964669	0.935043	1.36402	0.722214	1.20725	0.772045	1.5744	1.45898	1.54918	1.04288	0.949272	0.992869	0.807043	0.454539	0.613635	0.737304
	9	1.13	0.98	0.51	1.3	1.08	1.02458	1.27285	0.756154	0.774669	1.17146	0.92	0.69	0.86	0.47	0.64	0.781798	0.541607	0.486595	0.388634	0.609372
	13	1.34858	0.886973	0.80506	1.01727	0.942108	0.698586	1.30006	0.946094	1.00337	1.04485	0.954697	0.716301	1.0519	0.743549	0.645869	2.19308	5.72274	0.914714	0.638454	0.383201
	25	1.13873	0.959345	0.969565	1.02915	0.903211	0.755798	1.36903	1.06781	0.836487	0.971031	2.5012	2.34348	2.3807	2.44834	1.44796	1.3618	1.51541	1.97475	0.957344	1.31804
