# Supplementary material for: CTLA-4 antibody-drug conjugate reveals autologous destruction of B-lymphocytes associated with regulatory T cell impairment
Source: eLife journal article supplement (doi:10.7554/elife.87281), 2023-05-03
Supplement: fig3-data1 [file Figure 3-Source Data 2.xlsx]

## Sheet: Sheet1
	Fig. 3C
	days	hIgGFc										Ipi-DM1
	3	43.9	47.7	43.9	42.2	48.1	53	54.6	52	52	44.4	41.8	49.6	44.5	38.7	44.3	44.6	41.7	40.8	43.4	51.3
	9	51.4	46.9	43.3	45.9	45.7	47.5	46.5	45.5	45.9	42.3	28.4	35.7	37.8	22.2	24.4	33.7	25.5	30.3	20.7	31.3
	13	50.3	54.5	46.4	45.6	39.2	54.2	57.6	54.6	52.4	44.7	31.8	33.2	26.8	13	19.2	34.2	29.5	24.7	19.7	41
	25	51.4	40.6	42	33.5	33.5	52.1	47.2	51.5	50.9	41.8	41.6	55.9	40.8	28.9	34.2	44	55.3	40.8	28.4	37.8
