# Supplementary material for: CTLA-4 antibody-drug conjugate reveals autologous destruction of B-lymphocytes associated with regulatory T cell impairment
Source: eLife journal article supplement (doi:10.7554/elife.87281), 2023-05-03
Supplement: fig3-data1 [file Figure 3-Source Data 3.xlsx]

## Sheet: Sheet1
	Fig. 3D
	days	hIgGFc										Ipi-DM1
	3	0.996474	1.00545	1.0304	0.757928	1.20975	0.985854	1.61286	0.735465	1.18209	0.483613	1.28197	1.76291	1.24038	0.775998	0.902852	0.842973	0.673836	0.494762	0.611298	0.768342
	9	1.13	0.9	0.42	1	1.55	1.24519	1.29684	0.692955	0.82075	0.944167	0.49	0.64	0.65	0.29	0.37	0.746747	0.441315	0.4209	0.270749	0.521253
	13	1.19307	1.09749	0.775996	0.973531	0.959914	0.8837	1.31288	0.912209	1.09389	0.797764	0.569407	0.412125	0.481604	0.14934	0.23815	0.80064	0.8493	0.333928	0.347525	0.444456
	25	1.53704	0.776536	0.752378	0.728273	1.20577	1.0461	1.28042	1.10619	0.86806	0.698909	1.27595	2.35179	1.19649	0.819273	0.718927	1.3322	1.53618	1.47769	0.385046	0.600637
