# Supplementary material for: CTLA-4 antibody-drug conjugate reveals autologous destruction of B-lymphocytes associated with regulatory T cell impairment
Source: eLife journal article supplement (doi:10.7554/elife.87281), 2023-05-03
Supplement: fig3-data1 [file Figure 3-Source Data 4.xlsx]

## Sheet: Sheet1
	Fig. 3E
	days	hIgGFc										Ipi-DM1
	3	8.51	8.25	8.36	7.62	6.98	8.27	8.5	7.73	9.25	8.63	9.45	8.38	10	7.85	8.99	7.43	7.35	5.6	7.63	7.87
	9	8.63	8.3	7.45	8.38	6.42	7.2	8.12	8.45	7.58	8.72	7.91	6.31	7.78	5.74	6.56	6.35	5.3	6.74	5.66	6.79
	13	7.14	8.13	7.48	7.77	6.04	6.99	8.73	8.74	7.97	8.15	9.6	9.38	7.46	9.32	8.46	12.6	24.6	8.85	6.25	7.87
	25	5.89	6.23	6.22	7.56	5.23	7.98	8.6	8.98	9.65	8.96	10.5	10.3	12.1	11.8	12.1	12.1	14	11.3	12.3	16
