# Supplementary material for: CTLA-4 antibody-drug conjugate reveals autologous destruction of B-lymphocytes associated with regulatory T cell impairment
Source: eLife journal article supplement (doi:10.7554/elife.87281), 2023-05-03
Supplement: fig3-data1 [file Figure 3-Source Data 6.xlsx]

## Sheet: Sheet1
	Fig. 3H
	hIgGFc	Ipi-DM1
	83.8	70.3
	81.3	64.4
	76.4	61
	75	56.6
	75.9	41.9
	80.3	47.9
