# Supplementary material for: CTLA-4 antibody-drug conjugate reveals autologous destruction of B-lymphocytes associated with regulatory T cell impairment
Source: eLife journal article supplement (doi:10.7554/elife.87281), 2023-05-03
Supplement: fig3-data1 [file Figure 3-Source Data 7.xlsx]

## Sheet: Sheet1
	Fig. 3I
	hIgGFc	Ipi-DM1
	6.59	12.5
	7.18	15.6
	11.4	21
	11.3	22
	12.5	30.4
	9.06	27.4
