# Supplementary material for: CTLA-4 antibody-drug conjugate reveals autologous destruction of B-lymphocytes associated with regulatory T cell impairment
Source: eLife journal article supplement (doi:10.7554/elife.87281), 2023-05-03
Supplement: fig3-figsupp1-data1 [file elife-87281-fig3-figsupp1-data1-v1.zip]

## Sheet: Sheet1
	B) IgM
	days	hIgGFc					Ipi-DM1
	9	222.2	165.84	237.6	351.7	154.44	148.74	245.42	200.66	303.16	297.36
	13	265.4	202.22	190.56	288.44	292.78	479.64	554.62	281.46	367.24	481.42
	25	175.28	214.48	212.56	581.34	427.86	516.76	628.88	597.54	456.1	395.02
