# Supplementary material for: CTLA-4 antibody-drug conjugate reveals autologous destruction of B-lymphocytes associated with regulatory T cell impairment
Source: eLife journal article supplement (doi:10.7554/elife.87281), 2023-05-03
Supplement: fig3-figsupp1-data1 [file Figure 3-Figure Supplement 1-Source Data 1.xlsx]

## Sheet: Sheet1
	A) IgG
	days	hIgGFc					Ipi-DM1
	9	381.8	202	327	248	314.8	215.3	238	284.6	203.9	254.5
	13	325.8	253.2	231.5	244	474.7	271.7	261.3	261.6	274.8	321.5
	25	293.8	222.8	371.3	1176.7	825.3	296	280.7	374.9	286.2	447.7
