# Supplementary material for: CTLA-4 antibody-drug conjugate reveals autologous destruction of B-lymphocytes associated with regulatory T cell impairment
Source: eLife journal article supplement (doi:10.7554/elife.87281), 2023-05-03
Supplement: fig3-figsupp1-data1 [file Figure 3-Figure Supplement 1-Source Data 3.xlsx]

## Sheet: Sheet1
	C) IgA
	days	hIgGFc					Ipi-DM1
	9	29.3	28.4	34.3	14.9	61	70.5	181.3	196	131.8	41.1
	13	35.1	64	59.8	8.3	143.8	92.3	121.5	113.1	210	134.4
	25	23.5	51.7	44.6	12.9	204.5	191.3	378.6	257.1	160.1	56.5
