# Supplementary material for: CTLA-4 antibody-drug conjugate reveals autologous destruction of B-lymphocytes associated with regulatory T cell impairment
Source: eLife journal article supplement (doi:10.7554/elife.87281), 2023-05-03
Supplement: fig3-figsupp1-data1 [file Figure 3-Figure Supplement 1-Source Data 4.xlsx]

## Sheet: Sheet1
	D) IgE
	days	hIgGFc					Ipi-DM1
	9	100.5	38.65	76.1	107.4	454.75	1792.35	2655.6	142.1	495.15	348
	13	94.95	34.7	30.5	120.7	867.4	2050.6	2023	679.1	1540.1	1469.35
	25	56.15	31.85	719.6	639.65	536.85	1070.6	1486.9	1573.35	1292.45	1264.25
