# Supplementary material for: CTLA-4 antibody-drug conjugate reveals autologous destruction of B-lymphocytes associated with regulatory T cell impairment
Source: eLife journal article supplement (doi:10.7554/elife.87281), 2023-05-03
Supplement: fig3-figsupp2-data1 [file elife-87281-fig3-figsupp2-data1-v1.zip]

## Sheet: Sheet1
	A)
		hIgGFc							Ipi-DM1
	Day 9	77.5	81.4	97	80	73	97		80	98.7	96.1	107.6	82	113.3	120
	Day 13	81.5	71.3	85.8	91.7	80			104.4	161.2	98.4	137	123	127.4	126.7
