# Supplementary material for: CTLA-4 antibody-drug conjugate reveals autologous destruction of B-lymphocytes associated with regulatory T cell impairment
Source: eLife journal article supplement (doi:10.7554/elife.87281), 2023-05-03
Supplement: fig4-figsupp1-data1 [file elife-87281-fig4-figsupp1-data1-v1.zip]

## Sheet: Table S1
	Table 1
	Entry	A280	A252	CmAb (Moles)	CDM1(Moles)	DAR CDM1/CmAB
	hIgGFC-DM1	0.51	0.48	6.92705e-06	1.1531e-05	1.7
	Ipilimumab-DM1	0.62	0.42	2.30582e-06	7.32032e-06	3.2

## Sheet: Fig. 1-Fig supp-1
	CHO-hCTLA-4						WT CHO
	Ab ug/mL	Ipi		Ipi-DM1			Ab ug/mL	Ipi		Ipi-DM1
	1.5625	85.8385	103.354	23.4783	24.3478		1.5625	99.4009	94.7926	101.843	96.4977
	0.390625	77.5713	99.0087	20.0743	21.5613		0.390625	87.3888	96.7845	101.163	81.4595
	0.097656	101.255	120.502	39.3305	41.5621		0.097656	97.1576	105.004	106.272	91.6608
	0.024414	79.085	106.013	85.098	73.4641		0.024414	95.0157	105.523	95.1055	82.8918
	0.006104	86.5578	98.2412	91.0804	83.2915		0.006104	94.4054	108.811	104.371	91.8233

## Sheet: Fig. 1-Fig supp-3
	A) % CD4-nonTregs blood			A) normalized cell number			B)			C) % CD4-nonTregs BM			C) cell number			D)
	hIgGFc	Ipi-DM1		hIgGFc	Ipi-DM1		hIgGFc	Ipi-DM1		hIgGFc	Ipi-DM1		hIgGFc	Ipi-DM1		hIgGFc	Ipi-DM1
	20.8	20.3		0.904036	0.62463		0.712798	1.06967		0.48033	0.7191		83500	118000		1.00683	0.908703
	17.5	19.4		1.10464	0.884581		1.04127	1.34419		0.49734	0.4494		112000	92100		1.21587	0.895904
	20.6	21.8		1.1964	0.741253		1.22113	0.993942		0.71838	0.91904		121000	174000		0.772184	1.02816
	17	20.5		0.857136	0.622637		0.724158	1.04127		0.65601	1.35344		144000	234000		0.678328	1.04096
	19.1	21.3		0.912206	0.778519		1.7607	1.04127		0.98697	0.57876		196000	105000		1.32679	1.12628
	26.1	22.5		0.999126	0.998107		0.73741	1.05074
	22.8	22		1.02652	0.823452		0.802726	0.858576
	18.602	19.1806		1.15256	1.45584		0.995671	0.961261
	17.8295	16.9585		1.39686	0.679308		1.04865	1.04865
	17.6406	21.143		1.01636	0.850063		1.03991	1.1273
	15.1579	22.0528		0.885641	0.969604		0.866009	1.23216
	15.877	19.6781		0.743545	0.773316		0.90009	1.06613
	18.1474	18.4921		0.805039	0.682505		1.19721	1.01369
		17.1882			0.64059			1.20595

## Sheet: Fig. 1-Fig supp-4
	A) % foxp3 in CD4			A) normalized cell number			B)			C)			D) % CD4-nonTregs			D) normalized cell number
	hIgGFc	hIgGFc-DM1		hIgGFc	hIgGFc-DM1		hIgGFc	hIgGFc-DM1		hIgGFc	hIgGFc-DM1		hIgGFc	hIgGFc-DM1		hIgGFc	hIgGFc-DM1
	7.7	6.25		1.1	0.7		1.2182	1.42515		24.6	30.8		19.9	17.7		1	0.7
	7.2	7.2		1.1	1.1		1.26076	1.39873		35.2	31.8		17.9	16.5		1	1
	6.5	6.8		0.9	1		0.998043	1.0817		26.3	26.9		21	19.8		1	1
	5.9	6.4		0.8	0.8		0.817515	1.25636		23.2	37.9		20.5	18.2		0.9	0.9
	6	8		1	1.2		0.915851	1.00978		24.5	29.5		20	18.6		1.2	0.9
	6.9	5.4		1.2	0.4		0.789628	1.04648		21.8	33.9		22.8	18.9		1.1	0.5
	7.2	8.76		1.02	1.26		1.11417	1.40551		18.9	24.8		20.69	19.43		1.15	1.14
	8.12	7.98		1.27	0.95		1.08793	1.17192		22.3	16.8		21.22	21.35		1.25	0.95
	8.45	8.09		0.76	1.04		0.880577	1.08661		16.2	22		22.06	22.06		0.71	1.03
	7.58	8.76		0.77	0.77		1.07743	1.02756		19.3	24.3		21.63	17.7		0.82	0.7
	8.72	7.3		1.17	1.06		0.839895	1.17585		15.1	24.7		22.55	23.27		1.07	1.17
	E)			F) % B220			F) normalized cell number			G)
	hIgGFc	hIgGFc-DM1		hIgGFc	hIgGFc-DM1		hIgGFc	hIgGFc-DM1		hIgGFc	hIgGFc-DM1
	1.48501	1.67063		48.5	46.9		1	0.8		11.8	10.5
	0.950976	1.06092		49.3	44.2		1.2	1.1		13.2	9.18
	0.769634	1.16944		47	48.2		0.9	1		11	8.6
	0.908139	1.02094		46.4	48.9		0.8	1		5.64	5.84
	1.03379	1.0752		47.1	51.6		1.1	1.1		5.39	9.84
	0.852451	1.21371		41.4	48.6		0.9	0.6		11.9	6.28
	0.983718	1.25509		47.5	51.4		1.24519	1.42714		7.54	10.6
	1.14654	0.956581		46.5	46.1		1.29684	0.973781		11.4	15.6
	0.861601	0.970149		45.5	48.3		0.692955	1.06399		15.4	15.8
	1.17368	1.02442		45.9	49.8		0.82075	0.922697		10.7	14.6
	0.834464	1.03121		42.3	43.2		0.944167	1.02337		12.7	14.9

## Sheet: Fig. 1-Fig supp-6
	A) % foxp3 in CD4 spleen			A) cell number			B) % B220 spleen			B) cell number
	hIgGFc	Ipi-DM1		hIgGFc	Ipi-DM1		hIgGFc	Ipi-DM1		hIgGFc	Ipi-DM1
	9.87	9.54		570624	279184		45.6	37.1		6930000	2530000
	8.51	8.4		292732	245372		46.8	43.7		6230000	4580000
	8.57	9.56		472181	396486		51.6	45.1		11600000	5110000
	8.89	10.6		335545	440455		49	45.5		6250000	8670000
	7.55	9.42		235170	351694		46.6	42.3		6220000	5490000
	8.81	9.16		196807	187853		42.4	38.2		3060000	2250000
		8.94			178680			34.7			2860000
	C) % foxp3 in CD4 LNs			C) cell number			D) % B220 LNs			D) cell number
	hIgGFc	Ipi-DM1		hIgGFc	Ipi-DM1		hIgGFc	Ipi-DM1		hIgGFc	Ipi-DM1
	9.47	8.9		78231.6	117664		30.1	33.1		633418	1426385
	10.6	10.1		62152.2	260731		24.7	35.6		354079	2991639
	9.12	11.2		21717	160443		27.2	36.4		208015	1814009
	10.9	11.6		107994	128012		23.1	49.1		574150	2226263
	9.31	10.2		103337	192466		26	52.4		741374	4053402

## Sheet: Fig. 1-Fig supp-7
	B) % Pre B cells			B) cell number			C) % Pre-pro/pro B cells			C) cell number
	hIgGFc	Ipi-DM1		hIgGFc	Ipi-DM1		hIgGFc	Ipi-DM1		hIgGFc	Ipi-DM1
	19.3	23.9		404272	214698		11.9	25.6		249510	230563
	20.8	27		397834	349793		14.2	22.5		270933	291797
	14.4	26.8		154688	333220		17.9	15.2		191917	189227
	14.8	32.6		265650	238916		12.6	21		225834	153455
	15.6	23.1		159557	297383		13.2	21.3		135149	275088

## Sheet: Fig. 2-Fig supp-1
	A) blood
		hIgGFc					Ipi-DM1
	Early- Apo	1.19	1.35	1.02	1.3	1.1	1.41	2.41	1.48	1.25	1.55
	Late- Apo	0.72	1.05	0.96	1.75	0.78	0.98	1.39	0.52	0.37	2.08
	B) spleen
		hIgGFc					Ipi-DM1
	Early- Apo	9.68	10	9.13	6.84	8.68	10.9	10.7	9.26	7.98	9.77
	Late- Apo	40.6	42.3	47	48.9	56.2	47.5	47.9	43.6	57.8	52
	C) LNs
		hIgGFc					Ipi-DM1
	Early- Apo	4.07	4.86	2.11	6.66	8.88	3.85	3.09	11.8	11.3	13
	Late- Apo	79.2	83.1	88.1	86.3	82.5	77.8	70.3	71.5	65.8	67.9

## Sheet: Fig. 3-Fig supp-1
	A) IgG
	days	hIgGFc					Ipi-DM1
	9	381.8	202	327	248	314.8	215.3	238	284.6	203.9	254.5
	13	325.8	253.2	231.5	244	474.7	271.7	261.3	261.6	274.8	321.5
	25	293.8	222.8	371.3	1176.7	825.3	296	280.7	374.9	286.2	447.7
	B) IgM
	days	hIgGFc					Ipi-DM1
	9	222.2	165.84	237.6	351.7	154.44	148.74	245.42	200.66	303.16	297.36
	13	265.4	202.22	190.56	288.44	292.78	479.64	554.62	281.46	367.24	481.42
	25	175.28	214.48	212.56	581.34	427.86	516.76	628.88	597.54	456.1	395.02
	C) IgA
	days	hIgGFc					Ipi-DM1
	9	29.3	28.4	34.3	14.9	61	70.5	181.3	196	131.8	41.1
	13	35.1	64	59.8	8.3	143.8	92.3	121.5	113.1	210	134.4
	25	23.5	51.7	44.6	12.9	204.5	191.3	378.6	257.1	160.1	56.5
	D) IgE
	days	hIgGFc					Ipi-DM1
	9	100.5	38.65	76.1	107.4	454.75	1792.35	2655.6	142.1	495.15	348
	13	94.95	34.7	30.5	120.7	867.4	2050.6	2023	679.1	1540.1	1469.35
	25	56.15	31.85	719.6	639.65	536.85	1070.6	1486.9	1573.35	1292.45	1264.25

## Sheet: Fig. 3-Fig supp-2
	A)
		hIgGFc							Ipi-DM1
	Day 9	77.5	81.4	97	80	73	97		80	98.7	96.1	107.6	82	113.3	120
	Day 13	81.5	71.3	85.8	91.7	80			104.4	161.2	98.4	137	123	127.4	126.7

## Sheet: Fig. 4-Fig supp-1
	A) % CD4-T BM			A) cell number			B) % CD8-T BM			B) cell number			D) % foxp3 in CD4 THY			D) cell number			E) % CD4+CD8- THY			E) cell number
	hIgGFc	Ipi-DM1		hIgGFc	Ipi-DM1		hIgGFc	Ipi-DM1		hIgGFc	Ipi-DM1		hIgGFc	Ipi-DM1		hIgGFc	Ipi-DM1		hIgGFc	Ipi-DM1		hIgGFc	Ipi-DM1
	0.81	1.02		141000	167000		1.13	0.92		197000	151000		3.62	2.66		58151.2	25081		7.85	5.43		1606388	942894
	0.81	0.6		182000	123000		1.67	0.45		376000	92200		3.34	2.89		58685.9	59777.2		7.16	7.56		1757064	2068416
	1.17	1.28		198000	243000		1.41	1.37		238000	260000		3.68	3.98		92828.7	43586.9		9.8	8.59		2522520	1095148
	1.11	1.76		244000	304000		2.82	1.66		620000	287000		3.43	4.17		46125.4	37488		7.8	5.86		1344765	898992
	1.67	0.78		332000	142000		3.41	0.85		677000	154000		3.78	3.48		49048.5	48935.1		6.8	8.61		1297579	1406180
	F) % CD8+CD4- THY			F) cell number			G) % CD4+CD8+ THY			G) cell number			H) % CD4 spleen			H) cell number			I) % CD8 spleen			I) cell number
	hIgGFc	Ipi-DM1		hIgGFc	Ipi-DM1		hIgGFc	Ipi-DM1		hIgGFc	Ipi-DM1		hIgGFc	Ipi-DM1		hIgGFc	Ipi-DM1		hIgGFc	Ipi-DM1		hIgGFc	Ipi-DM1
	2.1	1.32		429734	229212		78.8	79.8		16125270	13856903		26.1	23.4		5.78279e+06	2.92747e+06		15.1	14.3		3.33924e+06	1.78865e+06
	1.74	2.02		426996	552672		79.4	78.1		19484760	21368160		22.5	24.9		3.43996e+06	2.92272e+06		14.6	14.3		2.22873e+06	1.68081e+06
	2.76	2.35		710424	299604		76.4	74.8		19665360	9536327		21.5	24.3		5.51013e+06	4.14622e+06		12	12.8		3.06218e+06	2.18607e+06
	1.6	1.66		275849	254663		75.9	79.9		13085600	12257587		22.4	21.4		3.77581e+06	4.14308e+06		13.4	11.3		2.25458e+06	2.18187e+06
	1.51	2.39		288139	390333		75.7	71.9		14445104	11742665		23	21.3		3.11309e+06	3.7325e+06		14.5	12.7		1.96449e+06	2.23578e+06
													24.4	20.8		2233864	2.05136e+06		14.3	12.8		1.31019e+06	1.26631e+06
														23.4			1.99768e+06			13.1			1.1178e+06
	J) % CD4 LNs			J) cell number			K) % CD8 LNs			K) cell number
	hIgGFc	Ipi-DM1		hIgGFc	Ipi-DM1		hIgGFc	Ipi-DM1		hIgGFc	Ipi-DM1
	42.6	36		826099	1322071		27.4	31		531341	1138450
	42.4	34.2		586341	2581498		31.9	29.5		441139	2226731
	46.1	33.3		238125	1432526		28	30		144631	1290564
	41.4	25.7		990768	1103548		34.7	26.1		830426	1120724
	39.3	25.5		1109958	1886918		33.8	21.7		954620	1605731

[truncated: 5 more sheets: Fig. 4-Fig supp-2, Fig. 4-Fig supp-3, Fig. 6-Fig supp-1, Fig. 6-Fig supp-2, Fig. 7-Fig supp-1]
