# Supplementary material for: CTLA-4 antibody-drug conjugate reveals autologous destruction of B-lymphocytes associated with regulatory T cell impairment
Source: eLife journal article supplement (doi:10.7554/elife.87281), 2023-05-03
Supplement: fig4-figsupp1-data1 [file Figure 4-Figure Supplement 1-Source Data 1.xlsx]

## Sheet: Sheet1
	A) % CD4-T BM			A) cell number
	hIgGFc	Ipi-DM1		hIgGFc	Ipi-DM1
	0.81	1.02		141000	167000
	0.81	0.6		182000	123000
	1.17	1.28		198000	243000
	1.11	1.76		244000	304000
	1.67	0.78		332000	142000
