# Supplementary material for: CTLA-4 antibody-drug conjugate reveals autologous destruction of B-lymphocytes associated with regulatory T cell impairment
Source: eLife journal article supplement (doi:10.7554/elife.87281), 2023-05-03
Supplement: fig4-figsupp1-data1 [file Figure 4-Figure Supplement 1-Source Data 2.xlsx]

## Sheet: Sheet1
	B) % CD8-T BM			B) cell number
	hIgGFc	Ipi-DM1		hIgGFc	Ipi-DM1
	1.13	0.92		197000	151000
	1.67	0.45		376000	92200
	1.41	1.37		238000	260000
	2.82	1.66		620000	287000
	3.41	0.85		677000	154000
