# Supplementary material for: CTLA-4 antibody-drug conjugate reveals autologous destruction of B-lymphocytes associated with regulatory T cell impairment
Source: eLife journal article supplement (doi:10.7554/elife.87281), 2023-05-03
Supplement: fig4-figsupp1-data1 [file Figure 4-Figure Supplement 1-Source Data 3.xlsx]

## Sheet: Sheet1
	D) % foxp3 in CD4 THY			D) cell number
	hIgGFc	Ipi-DM1		hIgGFc	Ipi-DM1
	3.62	2.66		58151.2	25081
	3.34	2.89		58685.9	59777.2
	3.68	3.98		92828.7	43586.9
	3.43	4.17		46125.4	37488
	3.78	3.48		49048.5	48935.1
