# Supplementary material for: CTLA-4 antibody-drug conjugate reveals autologous destruction of B-lymphocytes associated with regulatory T cell impairment
Source: eLife journal article supplement (doi:10.7554/elife.87281), 2023-05-03
Supplement: fig4-figsupp1-data1 [file Figure 4-Figure Supplement 1-Source Data 4.xlsx]

## Sheet: Sheet1
	E) % CD4+CD8- THY			E) cell number
	hIgGFc	Ipi-DM1		hIgGFc	Ipi-DM1
	7.85	5.43		1606388	942894
	7.16	7.56		1757064	2068416
	9.8	8.59		2522520	1095148
	7.8	5.86		1344765	898992
	6.8	8.61		1297579	1406180
