# Supplementary material for: CTLA-4 antibody-drug conjugate reveals autologous destruction of B-lymphocytes associated with regulatory T cell impairment
Source: eLife journal article supplement (doi:10.7554/elife.87281), 2023-05-03
Supplement: fig4-figsupp1-data1 [file Figure 4-Figure Supplement 1-Source Data 5.xlsx]

## Sheet: Sheet1
	F) % CD8+CD4- THY			F) cell number
	hIgGFc	Ipi-DM1		hIgGFc	Ipi-DM1
	2.1	1.32		429734	229212
	1.74	2.02		426996	552672
	2.76	2.35		710424	299604
	1.6	1.66		275849	254663
	1.51	2.39		288139	390333
