# Supplementary material for: CTLA-4 antibody-drug conjugate reveals autologous destruction of B-lymphocytes associated with regulatory T cell impairment
Source: eLife journal article supplement (doi:10.7554/elife.87281), 2023-05-03
Supplement: fig4-figsupp1-data1 [file Figure 4-Figure Supplement 1-Source Data 6.xlsx]

## Sheet: Sheet1
	G) % CD4+CD8+ THY			G) cell number
	hIgGFc	Ipi-DM1		hIgGFc	Ipi-DM1
	78.8	79.8		16125270	13856903
	79.4	78.1		19484760	21368160
	76.4	74.8		19665360	9536327
	75.9	79.9		13085600	12257587
	75.7	71.9		14445104	11742665
