# Supplementary material for: CTLA-4 antibody-drug conjugate reveals autologous destruction of B-lymphocytes associated with regulatory T cell impairment
Source: eLife journal article supplement (doi:10.7554/elife.87281), 2023-05-03
Supplement: fig4-figsupp1-data1 [file Figure 4-Figure Supplement 1-Source Data 8.xlsx]

## Sheet: Sheet1
	I) % CD8 spleen			I) cell number
	hIgGFc	Ipi-DM1		hIgGFc	Ipi-DM1
	15.1	14.3		3.33924e+06	1.78865e+06
	14.6	14.3		2.22873e+06	1.68081e+06
	12	12.8		3.06218e+06	2.18607e+06
	13.4	11.3		2.25458e+06	2.18187e+06
	14.5	12.7		1.96449e+06	2.23578e+06
	14.3	12.8		1.31019e+06	1.26631e+06
		13.1			1.1178e+06
