# Supplementary material for: CTLA-4 antibody-drug conjugate reveals autologous destruction of B-lymphocytes associated with regulatory T cell impairment
Source: eLife journal article supplement (doi:10.7554/elife.87281), 2023-05-03
Supplement: fig4-figsupp1-data1 [file Figure 4-Figure Supplement 1-Source Data 9.xlsx]

## Sheet: Sheet1
	J) % CD4 LNs			J) cell number
	hIgGFc	Ipi-DM1		hIgGFc	Ipi-DM1
	42.6	36		826099	1322071
	42.4	34.2		586341	2581498
	46.1	33.3		238125	1432526
	41.4	25.7		990768	1103548
	39.3	25.5		1109958	1886918
