# Supplementary material for: CTLA-4 antibody-drug conjugate reveals autologous destruction of B-lymphocytes associated with regulatory T cell impairment
Source: eLife journal article supplement (doi:10.7554/elife.87281), 2023-05-03
Supplement: fig4-figsupp1-data1 [file Figure 4-Figure Supplement 1-Source Data 10.xlsx]

## Sheet: Sheet1
	K) % CD8 LNs			K) cell number
	hIgGFc	Ipi-DM1		hIgGFc	Ipi-DM1
	27.4	31		531341	1138450
	31.9	29.5		441139	2226731
	28	30		144631	1290564
	34.7	26.1		830426	1120724
	33.8	21.7		954620	1605731
