# Supplementary material for: CTLA-4 antibody-drug conjugate reveals autologous destruction of B-lymphocytes associated with regulatory T cell impairment
Source: eLife journal article supplement (doi:10.7554/elife.87281), 2023-05-03
Supplement: fig4-figsupp2-data1 [file elife-87281-fig4-figsupp2-data1-v1.zip]

## Sheet: Sheet1
	B) CD4 -T spleen			B) CD8 -T spleen
	hIgGFc	Ipi-DM1		hIgGFc	Ipi-DM1
	11.2	23.9		12.9	31.5
	10.5	12.9		11.4	12.9
	14	23.8		20	29.3
	10.4	25.6		10.7	33.6
	8.51	15.9		9.56	17.7
	8.59	23		13	29.5
		21.2			29.5
