# Supplementary material for: CTLA-4 antibody-drug conjugate reveals autologous destruction of B-lymphocytes associated with regulatory T cell impairment
Source: eLife journal article supplement (doi:10.7554/elife.87281), 2023-05-03
Supplement: fig4-figsupp2-data1 [file Figure 4-Figure Supplement 2-Source Data 1.xlsx]

## Sheet: Sheet1
	A) CD4 -T BM			A) CD8 -T BM
	hIgGFc	Ipi-DM1		hIgGFc	Ipi-DM1
	16.4	30.8		13.9	31.2
	18.1	34.5		10.3	51.2
	21.5	25.5		14.4	22.9
	14.7	24.2		7.54	41.2
	14.5	33.6		7.83	46.2
