# Supplementary material for: CTLA-4 antibody-drug conjugate reveals autologous destruction of B-lymphocytes associated with regulatory T cell impairment
Source: eLife journal article supplement (doi:10.7554/elife.87281), 2023-05-03
Supplement: fig4-figsupp2-data1 [file Figure 4-Figure Supplement 2-Source Data 3.xlsx]

## Sheet: Sheet1
	C) CD4 -T LNs			C) CD8 -T LNs
	hIgGFc	Ipi-DM1		hIgGFc	Ipi-DM1
	10.7	29.8		8.67	35.3
	10.7	25.2		8.68	22.2
	9.09	31		13	23.6
	13.7	20.4		10.8	16.9
	17.1	20.6		19.5	18.5
