# Supplementary material for: CTLA-4 antibody-drug conjugate reveals autologous destruction of B-lymphocytes associated with regulatory T cell impairment
Source: eLife journal article supplement (doi:10.7554/elife.87281), 2023-05-03
Supplement: fig4-figsupp3-data1 [file elife-87281-fig4-figsupp3-data1-v1.zip]

## Sheet: Sheet1
	A) % CD4			A) cell number
	hIgGFc	hIgGFc-DM1		hIgGFc	hIgGFc-DM1
	21.7	18.9		1	0.7
	19.4	17.9		1	1
	22.6	21.3		1	1
	21.9	19.6		0.9	0.9
	21.4	20.3		1.1	1
	24.7	20.1		1.1	0.5
	22.3	21.3		1.14	1.15
	23.1	23.2		1.25	0.95
	24.1	24		0.72	1.03
	23.4	19.4		0.82	0.7
	24.7	25.1		1.07	1.16
