# Supplementary material for: CTLA-4 antibody-drug conjugate reveals autologous destruction of B-lymphocytes associated with regulatory T cell impairment
Source: eLife journal article supplement (doi:10.7554/elife.87281), 2023-05-03
Supplement: fig4-figsupp3-data1 [file Figure 4-Figure Supplement 3-Source Data 2.xlsx]

## Sheet: Sheet1
	B) % CD8			B) cell number
	hIgGFc	hIgGFc-DM1		hIgGFc	hIgGFc-DM1
	15.9	16.2		1	0.8
	13.7	16.8		0.9	1.2
	17.8	16.6		1	1
	16.8	15		0.9	0.9
	17.3	13.4		1.2	0.8
	17.8	16.3		1.1	0.6
	15	12.3		1.14	1
	15	15		1.22	0.92
	15.8	14.9		0.7	0.96
	15.2	15.8		0.79	0.85
	17.5	16.1		1.14	1.11
