# Supplementary material for: CTLA-4 antibody-drug conjugate reveals autologous destruction of B-lymphocytes associated with regulatory T cell impairment
Source: eLife journal article supplement (doi:10.7554/elife.87281), 2023-05-03
Supplement: fig4-figsupp3-data1 [file Figure 4-Figure Supplement 3-Source Data 3.xlsx]

## Sheet: Sheet1
	D) CD4-T			D) CD8-T
	hIgGFc	hIgGFc-DM1		hIgGFc	hIgGFc-DM1
	9.1	9.3		9.9	12.5
	10.1	10		13.5	10.6
	8.6	8.8		10.8	11.3
	8.3	8.3		11.3	8.7
	7.2	9.2		9.3	10.7
	8.2	7		10.5	10.4
	8.88	12.7		10.5	11.3
	11.1	9.88		14.2	13.5
	10	11.4		10.1	12.1
	10.5	10		12	10
	10.1	10.5		11	9.57
