# Supplementary material for: CTLA-4 antibody-drug conjugate reveals autologous destruction of B-lymphocytes associated with regulatory T cell impairment
Source: eLife journal article supplement (doi:10.7554/elife.87281), 2023-05-03
Supplement: fig5-data1 [file elife-87281-fig5-data1-v1.zip]

## Sheet: Sheet1
	Fig. 5G % CD4					Fig. 5G normalized cell number
	hIgGFc	Ipi-DM1	Ipi-DM1+αCD4	Ipi-DM1+αCD8		hIgGFc	Ipi-DM1	Ipi-DM1+αCD4	Ipi-DM1+αCD8
	14.3	11.3	0.16	12.9		0.92	0.52	0.01	0.79
	11.5	14.2	0.072	16.8		0.96	0.68	0	1.22
	16.7	11.7	0.088	14.8		1.3	0.63	0	1.02
	13.7	10.6	0.2	17.6		1	0.71	0.01	1.18
	17.7	14.1	0.08	17.2		0.82	0.75	0	0.62
	21.7	14.8	0.1	31.4		0.99	0.38	0	1.18
	19.4	18.5	0.2	23.8		1.02	0.72	0.01	0.83
	22.6	21	0.1	18.1		0.97	0.6	0	0.74
	21.9	21.7	0.1	21.2		0.87	0.56	0	0.6
	21.4	17.8	0.1	26		1.15	0.68	0	1.07
	24.7	17.6	0.2	22.3		1.14	0.67	0.01	0.68
