# Supplementary material for: CTLA-4 antibody-drug conjugate reveals autologous destruction of B-lymphocytes associated with regulatory T cell impairment
Source: eLife journal article supplement (doi:10.7554/elife.87281), 2023-05-03
Supplement: fig5-data1 [file Figure 5-Source Data 1.xlsx]

## Sheet: Sheet1
	Fig. 5C % CD4					Fig. 5C normalized cell number
	hIgGFc	Ipi-DM1	Ipi-DM1+αThy1.2	Ipi-DM1+ Clondrosome		hIgGFc	Ipi-DM1	Ipi-DM1+αThy1.2	Ipi-DM1+ Clondrosome
	22.4	18.2	3.62	15.2		0.9	0.51	0.11	0.52
	17.7	18.4	1.96	16		1.03	0.39	0.11	0.49
	19.7	14.1	0.96	16.8		0.86	0.71	0.05	0.6
	19.5	14.1	0.66	16.2		0.94	0.76	0.04	0.64
	19.1	14.1	0.88	11.9		1.27	0.65	0.03	0.73
	14.9	17.8	0.42	8.36		0.75	0.98	0.02	0.62
	12.8	13.7	1.89	15.8		0.83	0.66	0.19	0.63
	17.6	17.3	0.78	12.9		0.79	0.64	0.05	0.44
	16.1	13.9	1.15	12.2		0.82	0.79	0.06	0.6
	15.5	16.2	0.34	11.8		1.82	0.66	0.02	0.5
