# Supplementary material for: CTLA-4 antibody-drug conjugate reveals autologous destruction of B-lymphocytes associated with regulatory T cell impairment
Source: eLife journal article supplement (doi:10.7554/elife.87281), 2023-05-03
Supplement: fig5-data1 [file Figure 5-Source Data 5.xlsx]

## Sheet: Sheet1
	Fig. 5H % CD8					Fig. 5H normalized cell number
	hIgGFc	Ipi-DM1	Ipi-DM1+αCD4	Ipi-DM1+αCD8		hIgGFc	Ipi-DM1	Ipi-DM1+αCD4	Ipi-DM1+αCD8
	12.5	8.23	13.7	0.32		0.98	0.47	1.04	0.02
	9.76	11.6	10.6	0.7		1	0.68	0.66	0.06
	13	8.55	11.6	0.71		1.25	0.56	0.74	0.06
	11.9	8.51	13.8	0.62		1.07	0.7	0.98	0.05
	12.4	7.73	14.4	0.61		0.7	0.5	0.68	0.03
	15.9	14.5	19.1	0.9		0.95	0.49	0.57	0.05
	13.7	14.5	20.6	0.8		0.94	0.74	0.91	0.04
	17.8	17.3	20.1	0.4		1	0.65	0.98	0.02
	16.8	15.6	17.7	1.5		0.88	0.53	0.56	0.06
	17.3	16.4	21.7	1.1		1.22	0.82	0.73	0.06
	17.8	15.2	21.7	0.5		1.08	0.76	1.14	0.02
