# Supplementary material for: CTLA-4 antibody-drug conjugate reveals autologous destruction of B-lymphocytes associated with regulatory T cell impairment
Source: eLife journal article supplement (doi:10.7554/elife.87281), 2023-05-03
Supplement: fig6-figsupp1-data1 [file elife-87281-fig6-figsupp1-data1-v1.zip]

## Sheet: Sheet1
	B)
	Ab μg/ mL	Ipi			Ipi+ 6 μg/mL of Belatacept			Ipi+ 6 μg/mL of Abetacept			Ipi-DM1			Ipi-DM1+ 6 μg/mL of Belatacept			Ipi-DM1+ 6 μg/mL of Abetacept
	10	88.412	84.1125	76.8641	84.1844	81.9068	87.7967	82.9697	91.6966	89.403	20.0953	20.0186	20.7017	20.9387	17.8857	19.6631	22.6673	21.7124	23.5455
	2.5	92.2031	91.8421	88.4753	87.8624	89.1806	88.2738	97.0894	95.3095	100.968	24.3396	24.6687	25.0467	21.5186	22.4076	20.4475	33.7269	33.8459	34.0279
	0.625	92.5542	81.7172	88.1694	103.52	102.487	87.0151	91.3137	93.2175	108.913	27.4681	26.545	24.0427	25.2398	22.5283	22.6942	57.3231	53.566	64.8879
	0.15625	93.1411	78.9417	79.0731	82.6434	84.564	85.2535	89.8416	84.564	99.223	30.9562	30.5656	28.7574	26.9999	26.7973	30.5873	75.6401	92.261	88.2178
	0.0390625	97.2813	88.8174	86.4455	103.182	81.3438	85.1139	96.1911	90.9396	81.3105	39.8519	42.3832	37.3552	36.4309	37.769	38.7484	82.7041	89.7186	93.5948
	0.00976562	95.8086	85.833	87.8185	89.0452	102.37	89.82	90.5706	103.92	92.1041	81.1233	83.799	75.8949	64.8307	74.2027	79.5468	88.2247	107.555	90.8569
	0.00244141	85.3683	112.762	88.7983	93.1347	90.15	94.838	88.4311	96.4554	87.1497	100.01	87.2132	91.4834	99.2247	84.023	93.8022	82.0139	91.397	99.5775
