# Supplementary material for: CTLA-4 antibody-drug conjugate reveals autologous destruction of B-lymphocytes associated with regulatory T cell impairment
Source: eLife journal article supplement (doi:10.7554/elife.87281), 2023-05-03
Supplement: fig6-figsupp1-data1 [file Figure 6-Figure Supplement 1-Source Data 1.xlsx]

## Sheet: Sheet1
	A)
	Ab ug/ mL	Ipi	Ipi+ 6 ug/mL of Belatacept	Ipi+ 6 ug/mL of Abetacept	Ipi-DM1	Ipi-DM1+ 6 ug/mL of Belatacept	Ipi-DM1+ 6 ug/mL of Abetacept
	10	4863	4809	5293	4933	4934	5241
	2.5	4743	4795	1247	4941	5129	1542
	0.625	4560	4880	1069	4643	4696	1250
	0.1563	3648	3521	985	3291	3202	1201
	0.0391	2005	1978	1013	1891	1957	1166
	0.0098	1241	1278	1044	1318	1451	1132
	0	825	836	975	1066	1081	1172
