# Supplementary material for: CTLA-4 antibody-drug conjugate reveals autologous destruction of B-lymphocytes associated with regulatory T cell impairment
Source: eLife journal article supplement (doi:10.7554/elife.87281), 2023-05-03
Supplement: fig7-figsupp1-data1 [file elife-87281-fig7-figsupp1-data1-v1.zip]

## Sheet: Sheet1
	%B220				Cell number
	hIgGFc	Ipi-DM1	Ipi-DM1+αFASL		hIgGFc	Ipi-DM1	Ipi-DM1+αFASL
	48.8	33.8	38.1		565.276	282.033	665.277
	47.6	29.1	36		719.278	251.039	441.153
	53.6	38.2	27.6		755.893	370.092	153.926
	54.6	44.9	29.5		719.431	544.206	239.926
	50.8	33.6	23.1		422.541	321.194	238.2
