# Supplementary figures and images for: CTLA-4 antibody-drug conjugate reveals autologous destruction of B-lymphocytes associated with regulatory T cell impairment
Source: eLife journal article supplement (doi:10.7554/elife.87281), 2023-05-03

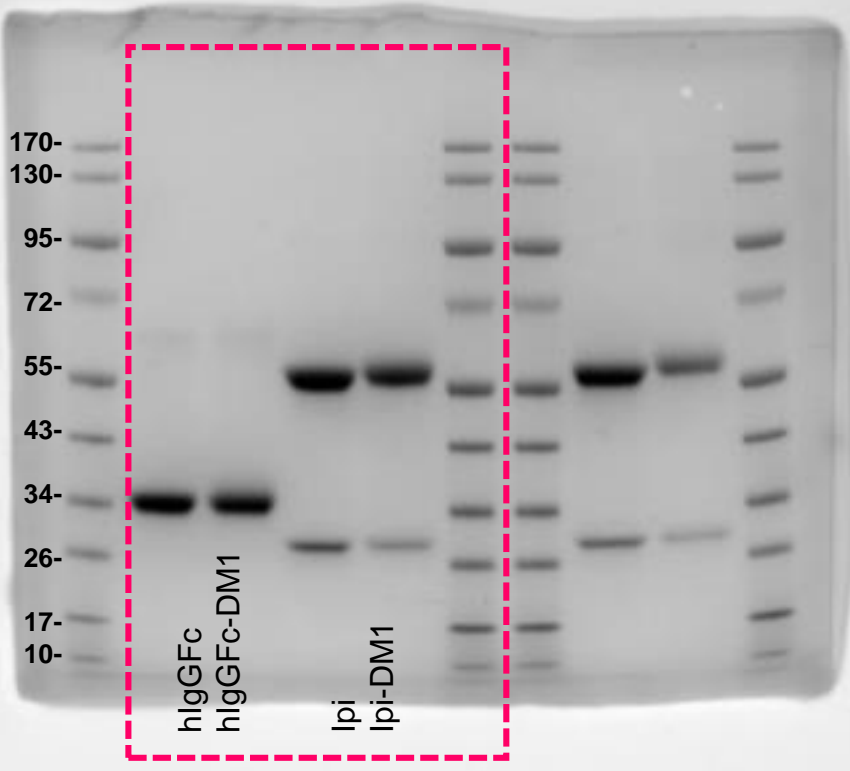

Supplement: fig1-data1 [file SDS-reduced Gel processed.pdf › Figure 1-Source Data/Figure 1- Source Data 1/SDS-reduced Gel processed.pdf]
